# Supplementary material
Source: Springer Nature journal article supplement (https://www.springermedizin.de/resource/supplementary/13075_2004_1205_MOESM4_ESM.pdf/9689218)

**(a)**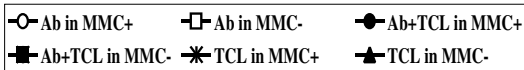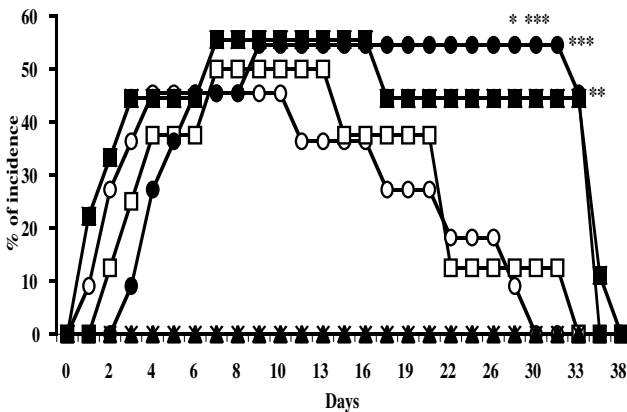**(b)**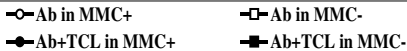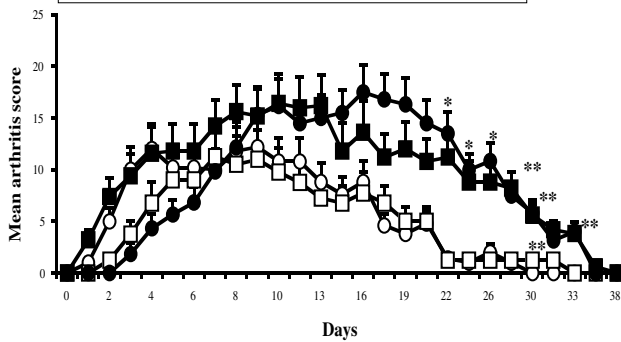

Supplement: MOESM4 [file 9689218]
